# Supplementary material
Source: PubMed Central journal article supplement (PMC9490499)
Supplement: jama-e2215632-s005.pdf [file jama-e2215632-s005.pdf]

## Supplemental Online Content

Lebwohl MG, Kircik LH, Moore AY, et al. Effect of roflumilast cream vs vehicle cream on chronic plaque psoriasis: the DERMIS-1 and DERMIS-2 randomized clinical trials. *JAMA*. Published September 20, 2022. doi:10.1001/jama.2022.15632

**eTable 1.** Investigator Global Assessment (IGA) Scale

**eTable 2.** Other Efficacy Endpoints

**eTable 3.** Summary of Psoriasis Symptoms Diary Total Scores

**eFigure.** Statistical Testing Hierarchy

This supplemental material has been provided by the authors to give readers additional information about their work.

**eTable 1. Investigator Global Assessment (IGA) Scale**

| Score | Grade        | Description                                                                                                                                                                                                                                                       |
|-------|--------------|-------------------------------------------------------------------------------------------------------------------------------------------------------------------------------------------------------------------------------------------------------------------|
| 0     | Clear        | Plaque thickening = no elevation or thickening over normal skin<br>Scaling = no evidence of scaling<br>Erythema = none (no residual red coloration but post-inflammatory hyperpigmentation may be present)                                                        |
| 1     | Almost Clear | Plaque thickening = none or possible thickening but difficult to ascertain if there is a slight elevation above normal skin level<br>Scaling = none or residual surface drying and scaling<br>Erythema = light pink coloration                                    |
| 2     | Mild         | Plaque thickening = slight but definite elevation<br>Scaling = fine scales partially or mostly covering the lesions<br>Erythema = light red coloration                                                                                                            |
| 3     | Moderate     | Plaque thickening = moderate elevation with rounded or sloped edges<br>Scaling = most lesions at least partially covered<br>Erythema = definite red coloration                                                                                                    |
| 4     | Severe       | Plaque thickening = marked or very marked elevation typically with hard or sharp edges<br>Scaling = non-tenacious or thick tenacious scale, covering most or all of lesions<br>Erythema = very bright red coloration; extreme red coloration; deep red coloration |

**eTable 2. Other Efficacy Endpoints**

|                                                           | DERMIS-1                              |                              |                            |                            |                | DERMIS-2                              |                              |                            |                            |                |
|-----------------------------------------------------------|---------------------------------------|------------------------------|----------------------------|----------------------------|----------------|---------------------------------------|------------------------------|----------------------------|----------------------------|----------------|
| <b>Other prespecified efficacy analyses</b>               | <b>Roflumilast Cream 0.3% (n=286)</b> | <b>Vehicle Cream (n=153)</b> | <b>Difference (95% CI)</b> | <b>Odds ratio (95% CI)</b> | <b>P value</b> | <b>Roflumilast cream 0.3% (n=290)</b> | <b>Vehicle Cream (n=152)</b> | <b>Difference (95% CI)</b> | <b>Odds ratio (95% CI)</b> | <b>P value</b> |
| IGA Success Week 2, % of patients (95% CI) <sup>a</sup>   | 5.9<br>(4, 9)<br>n=269                | 2.1<br>(1, 6)<br>n=143       | 5.4<br>(1.2, 9.5)          | 4.42<br>(1.05, 18.60)      | 0.06           | 3.3<br>(2, 6)<br>n=274                | 2.1<br>(1, 6)<br>n=145       | 1.3<br>(-1.8, 4.4)         | 1.75<br>(0.42, 7.29)       | 0.92           |
| IGA Success Week 4, % of patients (95% CI)                | 20.6<br>(16, 26)<br>n=262             | 2.3<br>(1, 6)<br>n=132       | 19.3<br>(13.5, 25.1)       | 13.44<br>(3.72, 48.58)     | <0.001         | 19.1<br>(15, 24)<br>n=267             | 5.8<br>(3, 11)<br>n=139      | 13.5<br>(7.2, 19.9)        | 3.91<br>(1.76, 8.70)       | 0.001          |
| IGA Success Week 6, % of patients (95% CI)                | 33.3<br>(28, 39)<br>n=252             | 6.1<br>(3, 12)<br>n=131      | 29.5<br>(22.1, 36.8)       | 10.23<br>(4.18, 25.07)     | <0.001         | 25.6<br>(21, 31)<br>n=258             | 4.7<br>(2, 10)<br>n=129      | 21.4<br>(14.5, 28.4)       | 6.72<br>(2.82, 16.00)      | <0.001         |
| I-IGA Success Week 2, % of patients (95% CI) <sup>b</sup> | 34.5<br>(24, 47)<br>n=58              | 13.3<br>(5, 30)<br>n=30      | 13.3<br>(-3.0, 29.6)       | 4.22<br>(0.52, 34.52)      | 0.33           | 34.7<br>(23, 49)<br>n=49              | 6.5<br>(2, 21)<br>n=31       | 27.0<br>(8.3, 45.8)        | 6.18<br>(1.18, 32.41)      | 0.03           |
| I-IGA Success Week 4, % of patients (95% CI)              | 42.3<br>(30, 56)<br>n=52              | 27.6<br>(15, 46)<br>n=29     | 9.9<br>(-13.7, 33.6)       | 1.69<br>(0.46, 6.22)       | 0.82           | 52.1<br>(38, 66)<br>n=48              | 17.9<br>(8, 36)<br>n=28      | 31.8<br>(10.1, 53.5)       | 5.12<br>(1.40, 18.69)      | 0.02           |
| I-IGA Success Week 6, % of patients (95% CI)              | 56.6<br>(43, 69)<br>n=53              | 22.2<br>(11, 41)<br>n=27     | 41.0<br>(20.1, 61.8)       | 10.51<br>(1.32, 83.49)     | 0.005          | 57.8<br>(43, 71)<br>n=45              | 13.8<br>(5, 31)<br>n=29      | 40.5<br>(18.7, 62.2)       | 7.35<br>(1.97, 27.50)      | 0.004          |
| I-IGA Clear Week 2, % of patients <sup>c</sup>            | 20.7<br>(12, 33)<br>n=58              | 13.3<br>(5, 30)<br>n=30      | -5.2<br>(-21.6, 11.2)      | 0.54<br>(0.08, 3.69)       | 0.95           | 30.6<br>(20, 45)<br>n=49              | 3.2<br>(1, 16)<br>n=31       | 27.3<br>(11.8, 42.8)       | 25.87<br>(1.41, 475.91)    | 0.02           |

|                                                                        |                           |                           |                          |                           |        |                            |                           |                         |                           |        |
|------------------------------------------------------------------------|---------------------------|---------------------------|--------------------------|---------------------------|--------|----------------------------|---------------------------|-------------------------|---------------------------|--------|
| I-IGA Clear<br>Week 4, % of<br>patients                                | 28.8<br>(18, 42)<br>n=52  | 24.1<br>(12, 42)<br>n=29  | -1.2<br>(-22.7,<br>20.2) | 0.92<br>(0.22,<br>3.81)   | 0.42   | 37.5<br>(25, 52)<br>n=48   | 10.7<br>(4, 27)<br>n=28   | 27.9<br>(8.2,<br>47.6)  | 6.06<br>(1.28,<br>28.70)  | 0.04   |
| I-IGA Clear<br>Week 6, % of<br>patients                                | 49.1<br>(36, 62)<br>n=53  | 14.8<br>(6, 32)<br>n=27   | 33.6<br>(12.0,<br>55.1)  | 6.48<br>(1.18,<br>35.70)  | 0.03   | 42.2<br>(29.9, 57)<br>n=45 | 10.3<br>(4, 26)<br>n=29   | 31.0<br>(10.3,<br>51.7) | 5.71<br>(1.35,<br>24.20)  | 0.02   |
| WI-NRS<br>Success<br>Week 6, % of<br>patients<br>(95% CI) <sup>d</sup> | 57.8<br>(51, 65)<br>n=192 | 22.2<br>(15, 31)<br>n=99  | 35.4<br>(24.1,<br>46.7)  | 5.28<br>(2.79,<br>9.99)   | <0.001 | 62.0<br>(55, 68)<br>n=205  | 30.6<br>(22, 40)<br>n=98  | 28.3<br>(16.6,<br>40.0) | 3.43<br>(1.93,<br>6.08)   | <0.001 |
| PASI-50<br>Week 2, % of<br>patients<br>(95% CI) <sup>e</sup>           | 29.9<br>(25, 36)<br>n=268 | 10.5<br>(6, 17)<br>n=143  | 21.0<br>(13.6,<br>28.4)  | 5.10<br>(2.45,<br>10.58)  | <0.001 | 28.7<br>(24, 34)<br>n=272  | 6.9<br>(4, 12)<br>n=145   | 21.8<br>(14.6,<br>29.0) | 5.12<br>(2.52,<br>10.40)  | <0.001 |
| PASI-50<br>Week 4, % of<br>patients<br>(95% CI)                        | 52.7<br>(47, 59)<br>n=262 | 19.7<br>(14, 27)<br>n=132 | 36.4<br>(27.5,<br>45.2)  | 5.92<br>(3.34,<br>10.49)  | <0.001 | 52.6<br>(47, 59)<br>n=266  | 15.8<br>(11, 23)<br>n=139 | 33.9<br>(25.0,<br>42.7) | 5.09<br>(2.98,<br>8.70)   | <0.001 |
| PASI-50<br>Week 6, % of<br>patients<br>(95% CI)                        | 67.1<br>(61, 73)<br>n=252 | 21.4<br>(15, 29)<br>n=131 | 47.5<br>(38.5,<br>56.5)  | 9.13<br>(4.93,<br>16.88)  | <0.001 | 63.2<br>(57, 69)<br>n=258  | 15.5<br>(10, 23)<br>n=129 | 43.1<br>(34.1,<br>52.1) | 7.87<br>(4.37,<br>14.18)  | <0.001 |
| PASI-50<br>Week 8, % of<br>patients<br>(95% CI)                        | 75.3<br>(70, 80)<br>n=255 | 26.5<br>(20, 35)<br>n=132 | 50.7<br>(41.3,<br>60.0)  | 9.24<br>(5.13,<br>16.63)  | <0.001 | 68.9<br>(63, 74)<br>n=264  | 24.4<br>(18, 32)<br>n=131 | 41.6<br>(31.9,<br>51.2) | 6.51<br>(3.73,<br>11.37)  | <0.001 |
| PASI-75<br>Week 2, % of<br>patients<br>(95% CI)                        | 8.6<br>(6, 13)<br>n=268   | 1.4<br>(0, 5)<br>n=143    | 7.4<br>(3.3,<br>11.6)    | 7.47<br>(1.64,<br>34.07)  | 0.008  | 2.6<br>(1, 5)<br>n=272     | 1.4<br>(0, 5)<br>n=145    | 1.9<br>(-1.0,<br>4.7)   | 2.57<br>(0.49,<br>13.56)  | 0.52   |
| PASI-75<br>Week 4 % of<br>patients<br>(95% CI)                         | 21.8<br>(17, 27)<br>n=262 | 3.0<br>(1, 8)<br>n=132    | 19.0<br>(13.0,<br>25.0)  | 10.44<br>(3.43,<br>31.78) | <0.001 | 16.2<br>(12, 21)<br>n=266  | 3.6<br>(2, 8)<br>n=139    | 11.8<br>(6.2,<br>17.5)  | 4.57<br>(1.77,<br>11.83)  | 0.002  |
| PASI-75<br>Week 6 % of<br>patients<br>(95% CI)                         | 31.3<br>(26, 37)<br>n=252 | 3.8<br>(2, 9)<br>n=131    | 27.8<br>(21.3,<br>34.4)  | 21.72<br>(5.87,<br>80.37) | <0.001 | 28.7<br>(24, 34)<br>n=258  | 3.9<br>(2, 9)<br>n=139    | 24.2<br>(17.6,<br>30.8) | 10.96<br>(3.98,<br>30.23) | <0.001 |

|                                                  |                           |                        |                         |                            |        |                           |                        |                        |                          |        |
|--------------------------------------------------|---------------------------|------------------------|-------------------------|----------------------------|--------|---------------------------|------------------------|------------------------|--------------------------|--------|
| PASI-90<br>Week 2, % of<br>patients<br>(95% CI)  | 2.2<br>(1, 5)<br>n=268    | 0.7<br>(0, 4)<br>n=143 | 2.1<br>(-0.4,<br>4.7)   | 4.64<br>(0.52,<br>41.56)   | 0.30   | 0.7<br>(0,3)<br>n=272     | 0<br>(0, 3)<br>n=145   | 1.0<br>(-0.2,<br>2.2)  | NE<br>(NE, NE)           | 0.4    |
| PASI-90<br>Week 4 % of<br>patients<br>(95% CI)   | 6.1<br>(4, 10)<br>n=262   | 0.8<br>(0, 4)<br>n=132 | 5.5<br>(2.2,<br>8.7)    | 14.87<br>(1.31,168.<br>26) | 0.02   | 5.6<br>(3, 9)<br>n=266    | 0<br>(0, 3)<br>n=139   | 6.1<br>(3.1,<br>9.2)   | NE<br>(NE, NE)           | 0.007  |
| PASI-90<br>Week 6 % of<br>patients<br>(95% CI)   | 13.1<br>(9,18)<br>n=252   | 1.5<br>(0,5)<br>n=131  | 12.1<br>(7.4,<br>16.8)  | 21.35<br>(2.52,180.<br>81) | <0.001 | 8.9<br>(6, 13)<br>n=258   | 0<br>(0,3)<br>n=139    | 9.1<br>(5.4,<br>12.8)  | NE<br>(NE, NE)           | <0.001 |
| PASI-90<br>Week 8, % of<br>patients<br>(95% CI)  | 22.4<br>(18, 28)<br>n=255 | 2.3<br>(1, 6)<br>n=132 | 20.9<br>(14.9,<br>26.9) | 17.16<br>(4.25,<br>69.22)  | <0.001 | 17.0<br>(13, 22)<br>n=264 | 2.3<br>(1, 7)<br>n=131 | 14.4<br>(8.8,<br>19.9) | 8.42<br>(2.45,<br>28.86) | <0.001 |
| PASI-100<br>Week 2, % of<br>patients<br>(95% CI) | 1.1<br>(0,3)<br>n=268     | 0<br>(0,3)<br>n=143    | 1.2<br>(-0.2,<br>2.6)   | NE<br>(NE, NE)             | 0.41   | 0<br>(0, 1)<br>n=272      | 0<br>(0, 3)<br>n=145   | 0<br>(0, 0)            | NE<br>(NE, NE)           | NE     |
| PASI-100<br>Week 4 % of<br>patients<br>(95% CI)  | 3.8<br>(2, 7)<br>n=262    | 0<br>(0,3)<br>n=132    | 3.6<br>(1.1,<br>6.0)    | NE<br>(NE, NE)             | 0.06   | 3.4<br>(2, 6)<br>n=266    | 0<br>(0, 3)<br>n=139   | 3.3<br>(1,0<br>5.6)    | NE<br>(NE, NE)           | 0.07   |
| PASI-100<br>Week 6 % of<br>patients<br>(95% CI)  | 8.7<br>(6, 13)<br>n=252   | 0.8<br>(0, 4)<br>n=131 | 7.5<br>(3.6,<br>11.3)   | 17.26<br>(1.75,170.<br>10) | 0.004  | 6.6<br>(4, 10)<br>n=258   | 0<br>(0,3)<br>n=139    | 6.6<br>(3.4,<br>9.8)   | NE<br>(NE, NE)           | 0.005  |
| PASI-100<br>Week 8, % of<br>patients<br>(95% CI) | 13.7<br>(10, 18)<br>n=255 | 1.5<br>(0, 5)<br>n=132 | 12.0<br>(7.0,<br>17.0)  | 10.51<br>(2.50,<br>44.14)  | <0.001 | 11.0<br>(8, 15)<br>n=264  | 0<br>(0, 3)<br>n=131   | 10.9<br>(6.8,<br>15.0) | NE<br>(NE, NE)           | <0.001 |

|                                                                         |                                  |                                  | <b>LS Mean<br/>(SE)<br/>difference<br/>from<br/>vehicle<br/>(95% CI)</b> |  |        |                                  |                                  | <b>LS Mean<br/>(SE)<br/>difference<br/>from<br/>vehicle<br/>(95% CI)</b> |  |        |
|-------------------------------------------------------------------------|----------------------------------|----------------------------------|--------------------------------------------------------------------------|--|--------|----------------------------------|----------------------------------|--------------------------------------------------------------------------|--|--------|
| Change from Baseline PSD Week 2, LS mean change (95% CI) <sup>f,g</sup> | -34.4<br>(-38.7, -30.1)<br>n=270 | -13.7<br>(-19.1, -8.4)<br>n=142  | -20.7<br>(-26.1, -15.3)                                                  |  | <0.001 | -32.6<br>(-37.2, -28.0)<br>n=266 | -15.6<br>(-21.2, -10.0)<br>n=141 | -17.0<br>(-22.4, -11.5)                                                  |  | <0.001 |
| Change from Baseline PSD Week 6, LS mean change (95% CI) <sup>g</sup>   | -48.0<br>(-52.6, -43.4)<br>n=251 | -17.2<br>(-23.0, -11.4)<br>n=130 | -30.8<br>(-36.6, -25.0)                                                  |  | <0.001 | -46.6<br>(-51.9, -41.4)<br>n=256 | -20.1<br>(-26.6, -13.6)<br>n=125 | -26.6<br>(-32.9, -20.2)                                                  |  | <0.001 |

Abbreviations: CfB, change from baseline; CI, confidence interval; IGA, Investigator Global Assessment; I-IGA, intertriginous-Investigator Global Assessment; NE, not estimable; PASI-50, achievement of 50% reduction in Psoriasis Area Severity Index from baseline; PASI-75, achievement of 75% reduction in Psoriasis Area Severity Index from baseline; PASI-90, achievement of 90% reduction in Psoriasis Area Severity Index from baseline; PASI-100, achievement of 100% reduction in Psoriasis Area Severity Index from baseline; PSD, Psoriasis Symptoms Diary; SE, standard error; WI-NRS, Worst Itch-Numeric Rating Scale.

<sup>a</sup> The IGA is a static evaluation of qualitative overall psoriasis severity. IGA Success indicates IGA status of Clear or Almost Clear plus  $\geq 2$ -grade improvement from baseline assessed on a 5-point scale ranging from 0 (Clear) to 4 (Severe) with higher scores reflecting more severe disease.<sup>11</sup>

<sup>b</sup> I-IGA Success indicates I-IGA status of Clear or Almost Clear plus  $\geq 2$ -grade improvement from baseline assessed on a 5-point scale ranging from 0 (Clear) to 4 (Severe) with higher scores reflecting more severe disease. Conducted for patients with intertriginous area involvement of at least Mild severity by IGA (I-IGA  $\geq 2$ ) at baseline, evaluating intertriginous areas only and not whole-body involvement

<sup>c</sup> Assessed on a 5-point scale ranging from 0 (Clear) to 4 (Severe) with higher scores reflecting more severe disease. Conducted for patients with intertriginous area involvement of at least Mild severity by IGA (I-IGA  $\geq 2$ ) at baseline, evaluating intertriginous areas only and not whole-body involvement.

<sup>d</sup> The WI-NRS is a simple, single item to assess the patient-reported severity of this symptom at its highest intensity during the previous 24-hour period on a scale from 0 (no itch) to 10 ("worst imaginable itch").<sup>13</sup> Higher scores indicate greater itch. WI-NRS Success indicates  $\geq 4$ -point reduction on the WI-NRS in patients with WI-NRS score  $\geq 4$  at baseline.

<sup>e</sup> PASI combines the assessment of the severity of lesions and the area affected into a single score ranging from 0 (no disease) to 72 (maximal disease) with higher scores reflecting more severe disease.<sup>12</sup>

<sup>f</sup> Patients used the PSD to determine the severity and impact of psoriasis-related signs and symptoms over the past 24 hours. Patients rated each variable in the 16-item assessment on a scale from 0 to 10, with higher scores indicating greater severity or burden.<sup>14</sup>

<sup>g</sup> See eTable 3 in Supplement 5 for additional details.

**eTable 3. Summary of Psoriasis Symptoms Diary Total Scores<sup>a</sup>**

| DERMIS-1 | Roflumilast Cream 0.3%<br>(n=286) |                                             |                                                        |                                                  |                                                       |                                                 | Vehicle Cream<br>(n=153) |                                             |                                                        |                                                  |
|----------|-----------------------------------|---------------------------------------------|--------------------------------------------------------|--------------------------------------------------|-------------------------------------------------------|-------------------------------------------------|--------------------------|---------------------------------------------|--------------------------------------------------------|--------------------------------------------------|
|          | Mean (SD)<br>Score <sup>b</sup>   | Change<br>from<br>Baseline,<br>Mean<br>(SD) | Difference<br>from<br>Baseline,<br>LS Mean<br>(95% CI) | P value<br>for<br>Difference<br>from<br>Baseline | Difference<br>from<br>Vehicle,<br>LS Mean<br>(95% CI) | P value<br>for<br>Difference<br>from<br>Vehicle | Mean<br>(SD)<br>Score    | Change<br>from<br>Baseline,<br>Mean<br>(SD) | Difference<br>from<br>Baseline,<br>LS Mean<br>(95% CI) | P value<br>for<br>Difference<br>from<br>Baseline |
| Baseline | 72.1 (42.75)<br>n=282             |                                             |                                                        |                                                  |                                                       |                                                 | 73.4<br>(41.29)<br>n=150 |                                             |                                                        |                                                  |
| Week 2   | 38.2 (35.28)<br>n=270             | -32.9<br>(32.31)<br>n=270                   | -34.2<br>(-38.6,<br>-29.8)<br>n=270                    | <0.001                                           | -20.1<br>(-25.6,<br>-14.6)                            | <0.001                                          | 58.0<br>(39.34)<br>n=142 | -15.9<br>(31.55)<br>n=142                   | -14.1<br>(-19.6,<br>-8.7)<br>n=142                     | <0.001                                           |
| Week 4   | 28.9 (32.47)<br>n=261             | -41.6<br>(35.94)<br>n=261                   | -43.1<br>(-47.9,<br>-38.3)<br>n=261                    | <0.001                                           | -24.5<br>(-30.4,<br>-18.5)                            | <0.001                                          | 53.1<br>(39.08)<br>n=130 | -18.9<br>(30.97)<br>n=130                   | -18.6<br>(-24.5,<br>-12.7)<br>n=130                    | <0.001                                           |
| Week 6   | 24.3 (29.41)<br>n=251             | -44.9<br>(36.16)<br>n=251                   | -47.1<br>(-51.8,<br>-42.3)<br>n=251                    | <0.001                                           | -30.0<br>(-35.9,<br>-24.0)                            | <0.001                                          | 54.3<br>(40.49)<br>n=130 | -16.8<br>(36.74)<br>n=130                   | -17.1<br>(-23.0,<br>-11.2)<br>n=130                    | <0.001                                           |
| Week 8   | 21.4 (30.04)<br>n=250             | -47.7<br>(38.03)<br>n=250                   | -49.0<br>(-53.9,<br>-44.1)<br>n=250                    | <0.001                                           | -29.6<br>(-35.8,<br>-23.4)                            | <0.001                                          | 50.0<br>(40.45)<br>n=129 | -21.2<br>(37.38)<br>n=129                   | -19.4<br>(-25.4,<br>-13.4)<br>n=129                    | <0.001                                           |

| DERMIS-2 | Roflumilast cream 0.3%<br>(n=290) |                                             |                                     |                                                  |                               |                                                 | Vehicle Cream<br>(n=152) |                                             |                                     |                                                  |
|----------|-----------------------------------|---------------------------------------------|-------------------------------------|--------------------------------------------------|-------------------------------|-------------------------------------------------|--------------------------|---------------------------------------------|-------------------------------------|--------------------------------------------------|
|          | Mean (SD)<br>Score <sup>b</sup>   | Change<br>from<br>Baseline,<br>mean<br>(SD) | Difference<br>from<br>Baseline      | P value<br>for<br>Difference<br>from<br>Baseline | Difference<br>from<br>Vehicle | P value<br>for<br>Difference<br>from<br>Vehicle | Mean<br>(SD)<br>Score    | Change<br>from<br>Baseline,<br>mean<br>(SD) | Difference<br>from<br>Baseline      | P value<br>for<br>Difference<br>from<br>Baseline |
| Baseline | 69.3 (40.66)<br>n=283             |                                             |                                     |                                                  |                               |                                                 | 77.4<br>(41.24)<br>n=148 |                                             |                                     |                                                  |
| Week 2   | 37.1 (35.21)<br>n=266             | -31.8<br>(31.13)<br>n=266                   | -32.7<br>(-37.4,<br>-28.0)<br>n=266 | <0.001                                           | -17.7<br>(-23.2,<br>-12.2)    | <0.001                                          | 59.3<br>(41.88)<br>n=141 | -17.9<br>(32.28)<br>n=141                   | -15.0<br>(-20.7,<br>-9.4)<br>n=141  | <0.001                                           |
| Week 4   | 27.5 (32.42)<br>n=262             | -41.0<br>(34.39)<br>n=262                   | -42.5<br>(-47.6,<br>-37.4)<br>n=262 | <0.001                                           | -26.4<br>(-32.3,<br>-20.4)    | <0.001                                          | 58.2<br>(40.78)<br>n=135 | -19.1<br>(33.95)<br>n=135                   | -16.1<br>(-22.3,<br>-10.0)<br>n=135 | <0.001                                           |
| Week 6   | 25.2 (32.26)<br>n=256             | -43.5<br>(35.13)<br>n=256                   | -47.4<br>(-52.7,<br>-42.1)<br>n=256 | <0.001                                           | -26.8<br>(-33.0,<br>-20.5)    | <0.0001                                         | 55.6<br>(41.67)<br>n=125 | -21.4<br>(38.01)<br>n=125                   | -20.6<br>(-27.1,<br>-14.1)<br>n=125 | <0.001                                           |
| Week 8   | 22.0 (33.25)<br>n=257             | -45.9<br>(35.43)<br>n=257                   | -49.9<br>(-55.4,<br>-44.3)<br>n=257 | <0.001                                           | -26.8<br>(-33.3,<br>-20.3)    | <0.001                                          | 53.6<br>(44.00)<br>n=127 | -23.8<br>(40.41)<br>n=127                   | -23.1<br>(-29.8,<br>-16.3)<br>n=127 | <0.001                                           |

SD, standard deviation.

<sup>a</sup> Patients used the Psoriasis Symptoms Diary to determine the severity and impact of psoriasis-related signs and symptoms over the past 24 hours. Patients rated each variable in the 16-item assessment on a scale from 0 to 10, with higher scores indicating greater severity or burden.<sup>14</sup>

<sup>b</sup> The mean scores are as observed and the LS mean change from baseline and LS mean change from vehicle, 95% CIs, and P values are from an analysis of covariance (ANCOVA) with treatment, site, baseline Investigator Global Assessment, baseline intertriginous involvement, and baseline Psoriasis Symptoms Diary score as independent variables.

## eFigure. Statistical Testing Hierarchy

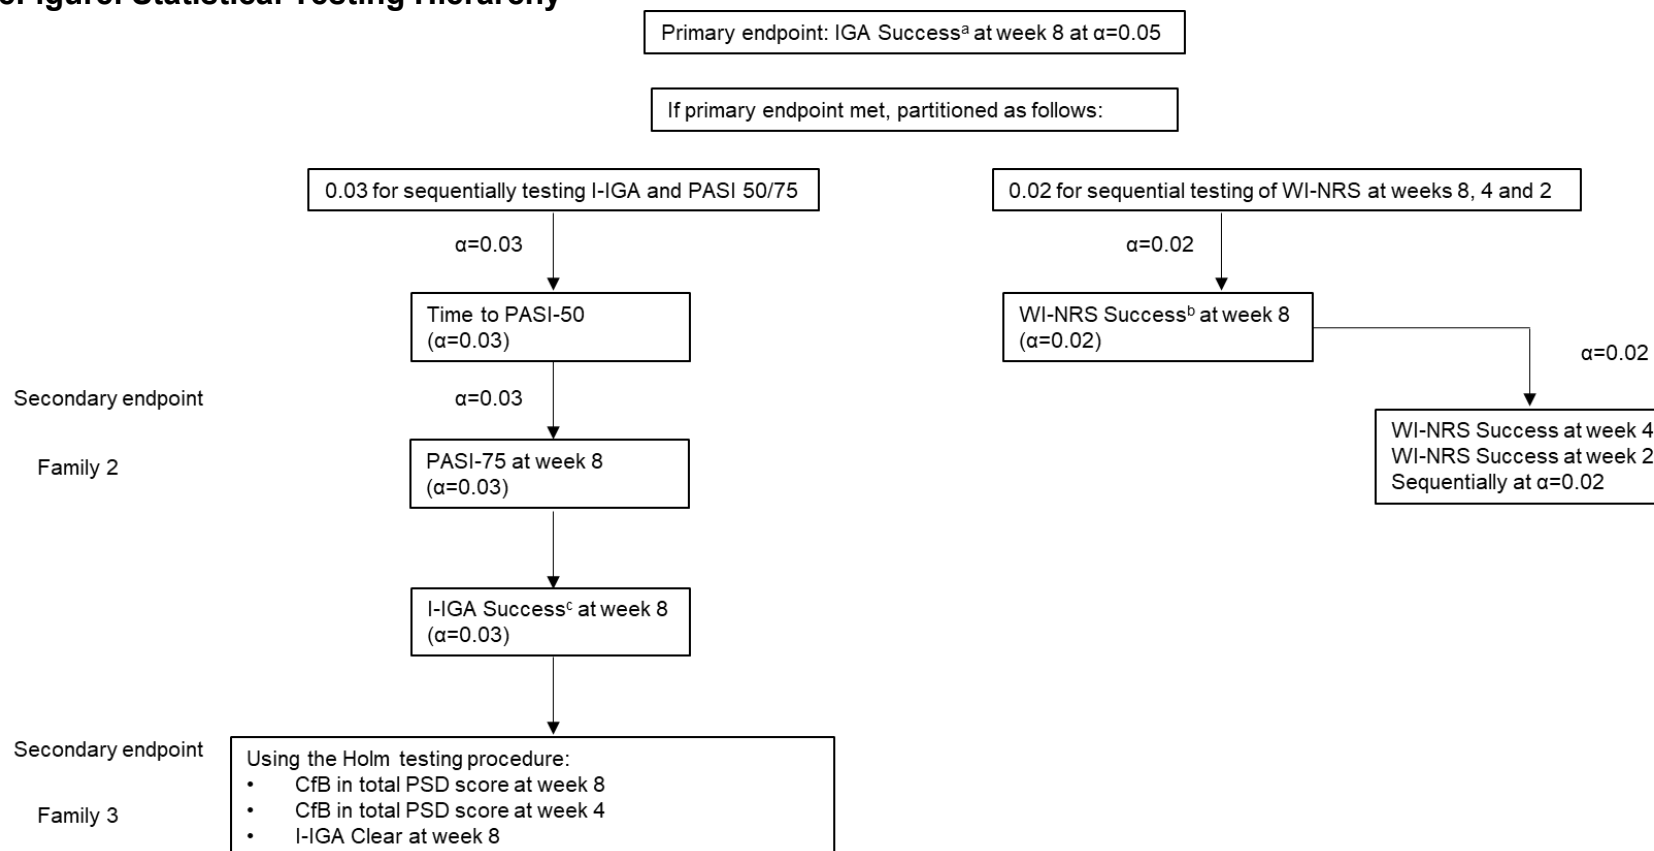

Abbreviations: CfB, change from baseline; CI, confidence interval; IGA, Investigator Global Assessment; I-IGA, intertriginous-Investigator Global Assessment; PASI-50, achievement of 50% reduction in Psoriasis Area Severity Index from baseline; PASI-75, achievement of 75% reduction in Psoriasis Area Severity Index from baseline; WI-NRS, Worst Itch-Numeric Rating Scale.

<sup>a</sup> The IGA is a static evaluation of qualitative overall psoriasis severity. IGA Success indicates IGA status of Clear or Almost Clear plus  $\geq 2$ -grade improvement from baseline assessed on a 5-point scale ranging from 0 (Clear) to 4 (Severe) with higher scores reflecting more severe disease.<sup>11</sup>

<sup>b</sup> The WI-NRS is a simple, single item to assess the patient-reported severity of this symptom at its highest intensity during the previous 24-hour period on a scale from 0 (no itch) to 10 ("worst imaginable itch").<sup>13</sup> Higher scores indicate greater itch. WI-NRS Success indicates  $\geq 4$ -point reduction on the WI-NRS in patients with WI-NRS score  $\geq 4$  at baseline.

<sup>c</sup> Conducted for patients with intertriginous area involvement of at least Mild severity by IGA (I-IGA  $\geq 2$ ) at baseline using a 5-point scale ranging from 0 (Clear) to 4 (Severe), evaluating intertriginous areas only and not whole-body involvement. Higher scores indicate more severe disease.
